# Supplementary material for: Endovascular treatment and cognitive outcome after anterior circulation ischemic stroke
Source: PubMed Central journal article supplement (PMC7595128; doi:10.1038/s41598-020-75609-1), 2020-10-28
Supplement: 41598_2020_75609_MOESM1_ESM.pdf [file 41598_2020_75609_MOESM1_ESM.pdf]

*Scientific Report - Electronic Supplementary Material*

**Endovascular treatment and cognitive outcome after anterior circulation  
ischemic stroke**

Simona Lattanzi<sup>1</sup>, Michela Coccia<sup>2</sup>, Alessandra Pulcini<sup>1</sup>, Claudia Cagnetti<sup>1</sup>, Federica Lucia Galli<sup>2</sup>,  
Laura Villani<sup>2</sup>, Serena Campa<sup>3</sup>, Mauro Dobran<sup>4</sup>, Gabriele Polonara<sup>3</sup>, Maria Gabriella Ceravolo<sup>2</sup>,  
Mauro Silvestrini<sup>1</sup>

<sup>1</sup>Neurological Clinic, Department of Experimental and Clinical Medicine, Marche Polytechnic University, Ancona, Italy

<sup>2</sup>Neurorehabilitation Clinic, Department of Experimental and Clinical Medicine, Marche Polytechnic University, Ancona, Italy.

<sup>3</sup>Clinic of Neuroradiology, Marche Polytechnic University, Ancona, Italy.

<sup>4</sup>Clinic of Neurosurgery, Marche Polytechnic University, Ancona, Italy.

Correspondence to: Simona Lattanzi, Neurological Clinic, Department of Experimental and Clinical Medicine, Marche Polytechnic University, Ancona, Italy; e-mail: [alfierelattanzisimona@gmail.com](mailto:alfierelattanzisimona@gmail.com)

**p3: Table e-1. Baseline characteristics of patients according to the availability of cognitive assessment**

**p4: Table e-2: Baseline characteristics of patients excluded due to aphasia and neglect**

**p5: e-Appendix-I**

**Table e-1. Baseline characteristics of patients according to the availability of cognitive assessment**

|                                    | <b>Cognitive assessment<br/>(n=132)</b> | <b>Lost to follow-up<br/>(n=21)</b> | <b>p value</b>     |
|------------------------------------|-----------------------------------------|-------------------------------------|--------------------|
| <b>Demographics</b>                |                                         |                                     |                    |
| Age (years)                        | 66.8 (13.1)                             | 68.2 (13.2)                         | 0.637 <sup>a</sup> |
| Male sex                           | 81 (61.4)                               | 14 (66.7)                           | 0.642 <sup>b</sup> |
| Education (years)                  | 8 [5-13]                                | 11 [8-13]                           | 0.533 <sup>c</sup> |
| <b>Clinical history</b>            |                                         |                                     |                    |
| Current smoking                    | 32 (24.2)                               | 6 (28.6)                            | 0.670 <sup>b</sup> |
| Hypertension                       | 82 (62.1)                               | 15 (71.4)                           | 0.411 <sup>b</sup> |
| Diabetes mellitus                  | 17 (12.9)                               | 3 (14.3)                            | 0.859 <sup>b</sup> |
| Dyslipidaemia                      | 60 (45.5)                               | 10 (47.6)                           | 0.853 <sup>b</sup> |
| Coronary artery disease            | 19 (14.4)                               | 3 (14.3)                            | 0.990 <sup>b</sup> |
| <b>Admission assessment</b>        |                                         |                                     |                    |
| Systolic BP (mmHg)                 | 150 [140-160]                           | 150 [135-150]                       | 0.282 <sup>c</sup> |
| Serum glucose (mg/dl)              | 119 [102-142]                           | 113 [91-135]                        | 0.246 <sup>c</sup> |
| NIHSS score                        | 13.6 (5.4)                              | 12.8 (5.8)                          | 0.514 <sup>a</sup> |
| ASPECTS value                      | 9 [8-10]                                | 9 [8-10]                            | 0.390 <sup>c</sup> |
| Location of intracranial occlusion |                                         |                                     | 0.420 <sup>b</sup> |
| Internal carotid artery            | 10 (4.8)                                | 1 (7.6)                             |                    |
| *Internal carotid artery terminus  | 12 (9.1)                                | 4 (19.1)                            |                    |
| Middle cerebral artery             |                                         |                                     |                    |
| First segment                      | 86 (65.2)                               | 10 (47.6)                           |                    |
| Second segment                     | 21 (15.9)                               | 5 (23.8)                            |                    |
| Anterior cerebral artery A1        | 3 (2.3)                                 | 1 (4.8)                             |                    |

Data are mean (SD) or median [IQR] for continuous variables, and n (%) for categorical variables.

\*Associated internal carotid artery and middle cerebral artery occlusion (tandem occlusion).

<sup>a</sup>Two-sample t test. <sup>b</sup>Chi-squared test. <sup>c</sup> Mann-Whitney test.

Abbreviations: ASPECT= Alberta Stroke Program Early CT, BP=blood pressure, IQR=interquartile range, NIHSS=National Institutes of Health Stroke Scale, SD=standard deviation.

**Table e-2. Baseline characteristics of patients excluded due to aphasia and neglect**

|                                    | <b>Aphasia/Neglect<br/>(n=44)</b> |
|------------------------------------|-----------------------------------|
| <b>Demographics</b>                |                                   |
| Age (years)                        | 67.8 (13.4)                       |
| Male sex                           | 24 (54.6)                         |
| Education (years)                  | 8 [5-13]                          |
| <b>Clinical history</b>            |                                   |
| Current smoking                    | 13 (29.6)                         |
| Hypertension                       | 29 (65.9)                         |
| Diabetes mellitus                  | 7 (15.9)                          |
| Dyslipidaemia                      | 15 (34.1)                         |
| Coronary artery disease            | 5 (11.4)                          |
| <b>Admission assessment</b>        |                                   |
| Systolic BP (mmHg)                 | 148 [140-160]                     |
| Serum glucose (mg/dl)              | 138 [100-157]                     |
| NIHSS score                        | 14.0 (5.1)                        |
| ASPECTS value                      | 9 [8-10]                          |
| Location of intracranial occlusion |                                   |
| Internal carotid artery            | 4 (9.0)                           |
| *Internal carotid artery terminus  | 8 (18.2)                          |
| Middle cerebral artery             |                                   |
| First segment                      | 30 (68.2)                         |
| Second segment                     | 1 (2.3)                           |
| Anterior cerebral artery A1        | 1 (2.3)                           |

Data are mean (SD) or median [IQR] for continuous variables, and n (%) for categorical variables.

\*Associated internal carotid artery and middle cerebral artery occlusion (tandem occlusion).

Abbreviations: ASPECT= Alberta Stroke Program Early CT, BP=blood pressure, IQR=interquartile range, NIHSS=National Institutes of Health Stroke Scale, SD=standard deviation.

**Appendix – I. Score ranges of cognitive tests**

| <b>Cognitive Test</b>                    | <b>Range (raw score)</b>              | <b>Adjusting variables</b> | <b>Range (adjusted score)</b> | <b>Pathological values</b> |
|------------------------------------------|---------------------------------------|----------------------------|-------------------------------|----------------------------|
| <b>Stroop Test</b>                       | Number of right answers in 30 seconds | Age, sex and education     |                               | ≤28                        |
| <b>Word reading</b>                      |                                       |                            |                               | ≤11                        |
| <b>Colour Naming</b>                     |                                       |                            |                               | >93                        |
| <b>Trail Making Test-A</b>               | Time in seconds                       | Age, education             |                               | >282                       |
| <b>Trail Making Test-B</b>               | Time in seconds                       | Age, education             |                               | <4.3                       |
| <b>Digit Span Test Forward</b>           | 2 to 9                                | Age, education             | 1.3 to 10.5                   | <2.7                       |
| <b>Digit Span Test Backward</b>          | 2 to 8                                | Age, education             | 1.2 to 9.6                    | ≤17.5                      |
| <b>Coloured Progressive Matrices</b>     | 0 to 36                               | Age, education             | -4.0 to 43.5                  |                            |
| <b>Rey Complex Figure Test</b>           |                                       | Age, education             |                               |                            |
| - Copy                                   | 0 to 31                               |                            | -1.4 to 32.8                  | ≤26.9                      |
| - Immediate Recall                       | 0 to 31                               |                            | -3.8 to 35.9                  | ≤16.8                      |
| - Delayed Recall                         | 0 to 31                               |                            | -3.9 to 36.3                  | ≤16.0                      |
| <b>Rey Auditory Verbal Learning Test</b> |                                       | Age, education             |                               |                            |
| - Immediate Recall                       | 0 to 75                               |                            | -12.7 to 87.2                 | ≤28.5                      |
| - Delayed Recall                         | 0 to 15                               |                            | -3.9 to 18.8                  | ≤4.7                       |
